# Supplementary material for: Effect of Water Chemistry on Antimony Removal by Chemical Coagulation: Implications of ζ-Potential and Size of Precipitates
Source: MDPI journal article supplement (doi:10.3390/ijms20122945), 2019-06-17

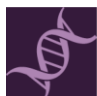

Supplementary Information

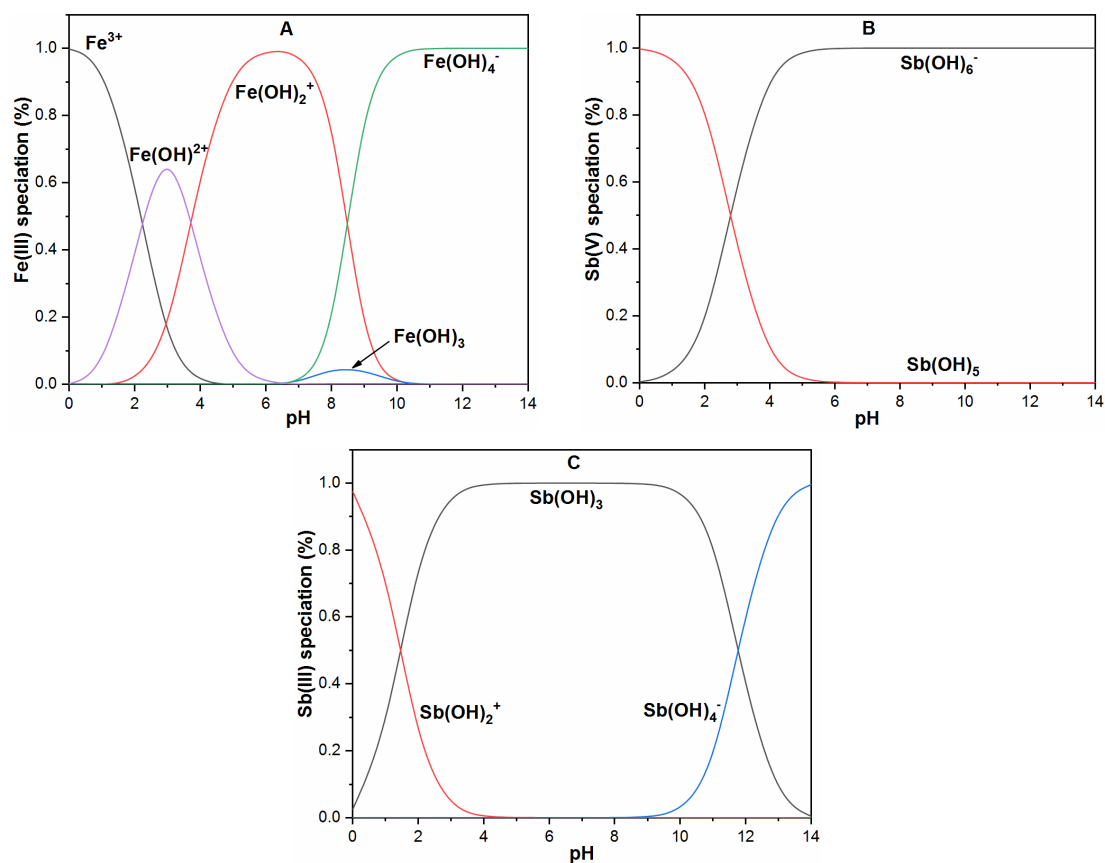

**Figure S1.** Speciation diagrams of (A) Fe(III); (B) Sb(V) and; (C) Sb(III) at 25 ± 1°C derived using Visual MINTEQ 3.1.

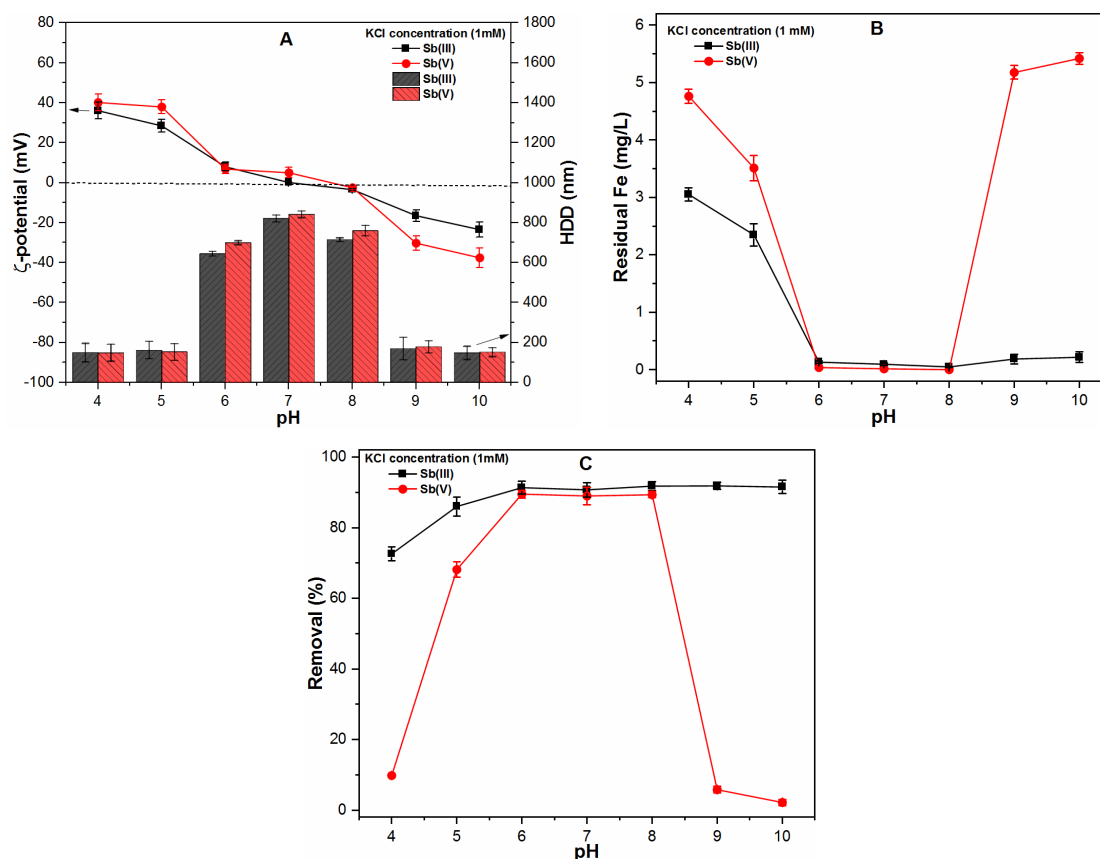

**Figure S2.** At various pH range (4-10), FC dose (0.1 mM), temperature ( $25 \pm 1^\circ\text{C}$ ), KCl concentration (1 mM) and Sb(III, V) concentration (1 mg/L) showing (A)  $\zeta$ -potential (mV) and HDD (nm) of precipitates; (B) Residual Fe (mg/L) and; (C) Removal (%) of both Sb species.

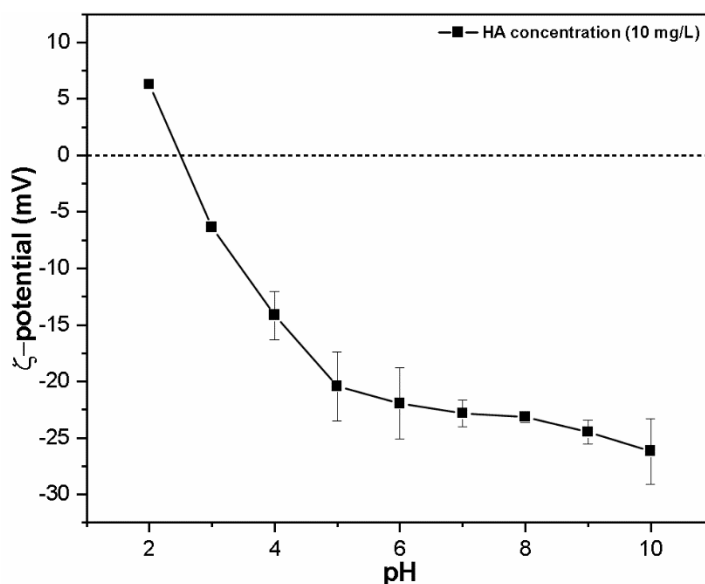

**Figure S1.**  $\zeta$ -potential of humic acid (10 mg/L) under different pH (4-10).

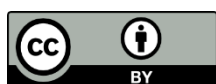

Supplement: s1 [file s1]
